# Supplementary material
Source: Springer Nature journal article supplement (https://www.springermedizin.de/resource/supplementary/12936_2008_900_MOESM1_ESM.pdf/9548494)

Ld 1 2 3 4 5 6 7 8 9 10 11 12 13 14 15 16 17 18 19 20 21 22 23

Ld PC

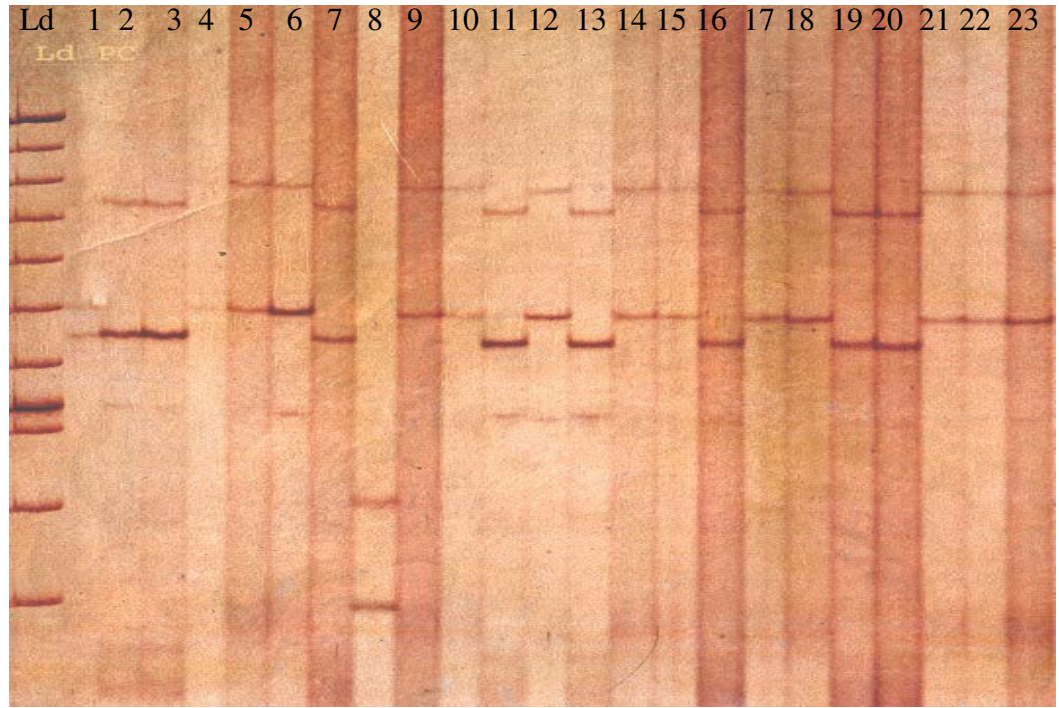

Supplement: MOESM1 [file 9548494]
